# Supplementary material
Source: ML conference proceedings conference paper supplement (https://aclanthology.org/P16-1067)
Supplement: Notes [file Supplementary.docx]

**Details of the Bible Dataset**

|  | **Author Name** | **Chapter Numbers** | **Literature Type** | **Number of Sentences** |
| --- | --- | --- | --- | --- |
| **1** | **Prov** | **1-31** | **Wisdom** | **915** |
| **2** | **Jer** | **1-52** | **Prophetic** | **1,364** |
| **3** | **Eze** | **1-48** | **Prophetic** | **1,273** |
| **4** | **Isa** | **1-35** | **Prophetic** | **676** |
| **5** | **Job** | **3-41** | **Wisdom** | **1,018** |

**Details of the New York Times Dataset**

|  | **Columnist Name** | **Number of Opinion Articles** | **Number of Sentences** |
| --- | --- | --- | --- |
| **1** | **TF** | **279** | **11,230** |
| **2** | **MD** | **299** | **11,660** |
| **3** | **PK** | **331** | **12,634** |
| **4** | **GC** | **273** | **11,327** |

| **Results of New York Times Documents created by combining articles of any pair of the four authors** | | | | | | |  |
| --- | --- | --- | --- | --- | --- | --- | --- |
|  | **MD+GC** | **MD+TF** | **MD+PK** | **GC+TF** | **GC+PK** | **TF+PK** |  |
| **Accuracy of Our Approach** | **94.0%** | **93.9%** | **96.3%** | **95.9%** | **94.1%** | **95.7%** |  |
|  |  |  |  |  |  |  |  |
|  |  |  |  |  |  |  |  |

**Details of the 12 Anonymous Federalist Papers**

| **Article Number** | **Topic** | **Number of Sentences** |
| --- | --- | --- |
| **49** | **Method of Guarding Against the Encroachments of Any One Department of Government by Appealing to the People Through a Convention.** | **57** |
| **50** | **Periodic Appeals to the People Considered.** | **41** |
| **51** | **The Structure of the Government Must Furnish the Proper Checks and Balances Between the Different Departments.** | **61** |
| **52** | **The House of Representatives.** | **61** |
| **53** | **The Same Subject Continued: The House of Representatives.** | **68** |
| **54** | **The Apportionment of Members Among the States.** | **64** |
| **55** | **The Total Number of the House of Representatives.** | **61** |
| **56** | **The Same Subject Continued: The Total Number of the House of Representatives.** | **47** |
| **57** | **The Alleged Tendency of the Plan to Elevate the Few at the Expense of the Many Considered in Connection with Representation.** | **78** |
| **58** | **Objection that the Number of Members Will Not Be Augmented as the Progress of Population Demands Considered.** | **61** |
| **62** | **The Senate.** | **75** |
| **63** | **The Senate Continued.** | **85** |
